# Supplementary material
Source: Elsevier journal article supplement (https://www.sciencedirect.com/science/article/pii/S2530064421000936)
Supplement: mmc1 [file S2530064421000936:mmc1.xlsx]

## Sheet: Dataset
ID	Country	ID Nest	Governmental_environmental_authority	Tolerance	Contributions	Actual_detriments	Top_down_local_management	Number_enviromental_workshops	Age	Gender	Years_Education	Number_domestic_fowl	Percentage_income_farming
1	Ecuador	E1	MAAE_Tungurahua	Increased	Benefits	no	Disapproval	0	45	Female	12	3	0
2	Ecuador	E1	MAAE_Tungurahua	Increased	Benefits	no	Disapproval	2	23	Female	12	0	0
3	Ecuador	E1	MAAE_Tungurahua	Increased	None	no	Approval	0	33	Female	6	9	100
4	Ecuador	E1	MAAE_Tungurahua	Reduced	Detriments	yes	Unknown	0	18	Female	9	2	100
5	Ecuador	E1	MAAE_Tungurahua	Increased	None	no	Approval	0	58	Male	6	4	0
6	Ecuador	E1	MAAE_Tungurahua	Kept_the_same	Detriments	no	Approval	20	32	Male	12	30	10
7	Ecuador	E1	MAAE_Tungurahua	Increased	Benefits	no	Approval	3	63	Male	12	0	100
8	Ecuador	E1	MAAE_Tungurahua	Kept_the_same	Benefits	yes	Disapproval	3	36	Male	18	50	20
9	Ecuador	E1	MAAE_Tungurahua	Increased	Detriments	yes	Approval	0	44	Male	6	5	10
10	Ecuador	E1	MAAE_Tungurahua	Reduced	Detriments	yes	Approval	0	28	Female	6	0	100
11	Ecuador	E1	MAAE_Tungurahua	Kept_the_same	Detriments	yes	Disapproval	0	76	Male	2	10	80
12	Ecuador	E1	MAAE_Tungurahua	Reduced	Detriments	yes	Approval	1	71	Male	4	8	100
13	Ecuador	E1	MAAE_Tungurahua	Kept_the_same	Detriments	no	Approval	2	38	Male	6	0	100
14	Ecuador	E1	MAAE_Tungurahua	Increased	Benefits	no	Approval	50	54	Female	21	0	0
15	Ecuador	E1	MAAE_Tungurahua	Increased	Benefits	no	Approval	4	43	Male	9	4	100
16	Ecuador	E1	MAAE_Tungurahua	Increased	None	no	Disapproval	0	65	Male	6	0	20
17	Ecuador	E1	MAAE_Tungurahua	Increased	Both	yes	Approval	0	37	Male	6	0	100
18	Ecuador	E1	MAAE_Tungurahua	Kept_the_same	None	yes	Disapproval	0	71	Male	2	26	100
19	Ecuador	E1	MAAE_Tungurahua	Increased	None	no	Approval	0	40	Male	6	0	50
20	Ecuador	E1	MAAE_Tungurahua	Increased	Benefits	no	Approval	0	29	Male	6	30	100
21	Ecuador	E1	MAAE_Tungurahua	Increased	Benefits	yes	Disapproval	0	36	Female	6	4	0
22	Ecuador	E1	MAAE_Tungurahua	Increased	Benefits	no	Approval	51	50	Male	15	0	0
23	Ecuador	E1	MAAE_Tungurahua	Increased	Benefits	no	Approval	0	35	Male	6	40	100
24	Ecuador	E1	MAAE_Tungurahua	Kept_the_same	Detriments	no	Approval	3	70	Male	18	0	30
25	Ecuador	E1	MAAE_Tungurahua	Reduced	Detriments	yes	Disapproval	20	30	Male	6	7	100
26	Ecuador	E1	MAAE_Tungurahua	Reduced	Detriments	no	Disapproval	1	44	Male	5	0	100
27	Ecuador	E1	MAAE_Tungurahua	Reduced	Detriments	yes	Disapproval	0	45	Female	6	1	100
28	Ecuador	E1	MAAE_Tungurahua	Reduced	Detriments	yes	Approval	4	38	Male	6	4	100
29	Ecuador	E1	MAAE_Tungurahua	Increased	Benefits	no	Disapproval	30	72	Male	12	3	50
30	Ecuador	E1	MAAE_Tungurahua	Kept_the_same	Detriments	yes	Approval	5	43	Male	6	0	100
31	Ecuador	E2	MAAE_Tungurahua	Kept_the_same	Detriments	no	Disapproval	0	50	Female	9	5	0
32	Ecuador	E2	MAAE_Tungurahua	Reduced	Detriments	yes	Approval	0	63	Male	6	35	0
33	Ecuador	E3	MAAE_Tungurahua	Kept_the_same	None	no	Disapproval	0	66	Male	12	6	100
34	Ecuador	E3	MAAE_Tungurahua	Kept_the_same	Detriments	no	Disapproval	0	50	Male	6	0	100
35	Ecuador	E3	MAAE_Tungurahua	Kept_the_same	None	yes	Disapproval	0	74	Male	6	0	100
36	Ecuador	E3	MAAE_Tungurahua	Kept_the_same	Detriments	yes	Disapproval	0	45	Female	10	14	0
37	Ecuador	E4	MAAE_Tungurahua	Reduced	Detriments	yes	Unknown	0	77	Female	1	15	0
38	Ecuador	E5	MAAE_Tungurahua	Kept_the_same	Detriments	no	Unknown	0	50	Female	0	3	0
39	Ecuador	E5	MAAE_Tungurahua	Kept_the_same	Detriments	no	Unknown	0	27	Female	12	0	0
40	Ecuador	E5	MAAE_Tungurahua	Reduced	Detriments	yes	Unknown	0	26	Male	6	20	100
41	Ecuador	E5	MAAE_Tungurahua	Kept_the_same	Detriments	no	Disapproval	0	49	Female	6	0	0
42	Ecuador	E5	MAAE_Tungurahua	Increased	Benefits	no	Unknown	5	40	Male	15	0	0
43	Ecuador	E5	MAAE_Tungurahua	Reduced	Detriments	no	Disapproval	0	80	Female	6	4	0
44	Ecuador	E6	MAAE_Tungurahua	Increased	Benefits	yes	Disapproval	3	26	Male	12	0	0
45	Ecuador	E6	MAAE_Tungurahua	Reduced	Detriments	yes	Approval	0	62	Male	4	13	0
46	Ecuador	E6	MAAE_Tungurahua	Kept_the_same	Detriments	no	Unknown	0	58	Male	6	0	0
47	Ecuador	E6	MAAE_Tungurahua	Kept_the_same	Benefits	no	Disapproval	7	56	Male	16	0	0
48	Ecuador	E6	MAAE_Tungurahua	Increased	Detriments	no	Approval	3	27	Female	12	15	0
49	Ecuador	E7	MAAE_Tungurahua	Reduced	Detriments	no	Disapproval	4	64	Male	17	18	0
50	Ecuador	E7	MAAE_Tungurahua	Reduced	Detriments	no	Unknown	0	60	Male	8	15	100
51	Ecuador	E7	MAAE_Tungurahua	Increased	Detriments	no	Unknown	3	58	Male	6	0	100
52	Ecuador	E7	MAAE_Tungurahua	Increased	Benefits	no	Unknown	0	50	Male	12	30	100
53	Ecuador	E7	MAAE_Tungurahua	Increased	Detriments	no	Unknown	0	70	Male	6	51	0
54	Ecuador	E7	MAAE_Tungurahua	Increased	None	yes	Approval	3	54	Male	6	0	100
55	Ecuador	E7	MAAE_Tungurahua	Reduced	Detriments	yes	Unknown	0	49	Female	1	25	100
56	Ecuador	E7	MAAE_Tungurahua	Reduced	Detriments	yes	Unknown	5	46	Female	12	0	25
57	Ecuador	E8	MAAE_Carchi	Kept_the_same	Detriments	yes	Disapproval	3	59	Male	12	30	50
58	Ecuador	E8	MAAE_Carchi	Kept_the_same	Detriments	yes	Approval	0	21	Male	7	7	0
59	Ecuador	E8	MAAE_Carchi	Increased	Detriments	yes	Approval	0	20	Female	12	30	0
60	Ecuador	E8	MAAE_Carchi	Reduced	Detriments	yes	Unknown	0	67	Female	6	10	0
61	Ecuador	E8	MAAE_Carchi	Kept_the_same	Detriments	no	Disapproval	3	49	Male	6	100	100
62	Ecuador	E8	MAAE_Carchi	Increased	Detriments	no	Disapproval	5	60	Male	6	20	100
63	Ecuador	E8	MAAE_Carchi	Increased	Benefits	yes	Approval	0	63	Male	6	0	100
64	Ecuador	E8	MAAE_Carchi	Kept_the_same	None	yes	Disapproval	4	40	Female	12	20	100
65	Ecuador	E8	MAAE_Carchi	Kept_the_same	Detriments	no	Approval	0	23	Female	12	0	100
66	Ecuador	E8	MAAE_Carchi	Kept_the_same	Detriments	no	Approval	2	36	Female	9	30	100
67	Ecuador	E8	MAAE_Carchi	Kept_the_same	Detriments	yes	Unknown	0	39	Female	6	1	100
68	Ecuador	E8	MAAE_Carchi	Kept_the_same	Detriments	no	Approval	1	76	Male	0	5	100
69	Ecuador	E8	MAAE_Carchi	Increased	Detriments	no	Disapproval	0	70	Male	0	5	100
70	Ecuador	E8	MAAE_Carchi	Kept_the_same	None	no	Approval	3	50	Male	6	0	100
71	Ecuador	E8	MAAE_Carchi	Reduced	Detriments	yes	Approval	1	28	Female	12	30	100
72	Ecuador	E8	MAAE_Carchi	Increased	Detriments	no	Approval	2	50	Female	17	5	0
73	Ecuador	E8	MAAE_Carchi	Kept_the_same	Detriments	yes	Approval	0	52	Male	6	15	100
74	Ecuador	E8	MAAE_Carchi	Increased	None	no	Disapproval	4	78	Male	12	15	100
75	Ecuador	E8	MAAE_Carchi	Increased	Detriments	no	Disapproval	1	55	Male	3	3	100
76	Ecuador	E8	MAAE_Carchi	Kept_the_same	Detriments	no	Approval	50	67	Female	3	50	100
77	Ecuador	E8	MAAE_Carchi	Kept_the_same	Detriments	no	Disapproval	10	52	Male	6	6	100
78	Ecuador	E8	MAAE_Carchi	Reduced	Detriments	yes	Approval	0	73	Male	6	20	0
79	Ecuador	E9	MAAE_Imbabura	Increased	Benefits	no	Disapproval	3	46	Male	6	4	0
80	Ecuador	E9	MAAE_Imbabura	Kept_the_same	Detriments	no	Unknown	0	75	Male	0	15	0
81	Ecuador	E9	MAAE_Imbabura	Kept_the_same	Detriments	yes	Disapproval	2	75	Female	6	5	0
82	Ecuador	E9	MAAE_Imbabura	Increased	Detriments	no	Approval	4	48	Male	6	1000	0
83	Ecuador	E9	MAAE_Imbabura	Increased	Detriments	no	Disapproval	3	57	Male	3	25	0
84	Ecuador	E9	MAAE_Imbabura	Kept_the_same	Detriments	no	Disapproval	10	72	Male	6	50	100
85	Ecuador	E9	MAAE_Imbabura	Increased	Detriments	no	Approval	0	49	Male	6	0	0
86	Ecuador	E9	MAAE_Imbabura	Increased	Both	no	Approval	20	40	Male	14	0	50
87	Ecuador	E10	MAAE_Pichincha	Reduced	Detriments	yes	Approval	1	32	Female	6	30	0
88	Ecuador	E10	MAAE_Pichincha	Reduced	Detriments	yes	Approval	0	30	Female	6	30	0
89	Ecuador	E10	MAAE_Pichincha	Kept_the_same	Detriments	yes	Disapproval	0	58	Female	0	10	90
90	Ecuador	E10	MAAE_Pichincha	Increased	Detriments	yes	Approval	2	36	Female	6	17	100
91	Ecuador	E10	MAAE_Pichincha	Reduced	Detriments	yes	Approval	0	59	Male	3	20	100
92	Ecuador	E11	MAAE_Imbabura	Reduced	Detriments	yes	Disapproval	0	64	Female	4	4	100
93	Ecuador	E11	MAAE_Imbabura	Increased	None	no	Disapproval	0	52	Male	6	0	100
94	Ecuador	E11	MAAE_Imbabura	Kept_the_same	Detriments	yes	Approval	0	25	Female	9	20	100
95	Ecuador	E11	MAAE_Imbabura	Increased	Benefits	yes	Approval	0	41	Female	6	30	100
96	Ecuador	E11	MAAE_Imbabura	Increased	Benefits	no	Approval	5	66	Male	6	10	100
97	Ecuador	E12	MAAE_Imbabura	Kept_the_same	Both	yes	Unknown	0	25	Female	6	8	0
98	Ecuador	E12	MAAE_Imbabura	Increased	Benefits	yes	Disapproval	0	47	Male	6	10	100
99	Ecuador	E12	MAAE_Imbabura	Kept_the_same	Detriments	yes	Disapproval	2	38	Female	12	50	0
100	Ecuador	E12	MAAE_Imbabura	Increased	None	no	Disapproval	3	34	Female	14	100	100
101	Ecuador	E12	MAAE_Imbabura	Reduced	Detriments	no	Approval	2	43	Male	6	10	100
102	Ecuador	E13	MAAE_Imbabura	Kept_the_same	Benefits	no	Disapproval	6	50	Male	6	15	100
103	Ecuador	E13	MAAE_Imbabura	Reduced	Detriments	no	Disapproval	0	70	Male	4	20	100
104	Ecuador	E13	MAAE_Imbabura	Increased	Detriments	no	Disapproval	2	40	Female	8	12	100
105	Ecuador	E13	MAAE_Imbabura	Kept_the_same	Detriments	no	Approval	3	18	Male	12	15	100
106	Ecuador	E13	MAAE_Imbabura	Reduced	Detriments	no	Disapproval	2	62	Male	4	10	100
107	Ecuador	E13	MAAE_Imbabura	Reduced	Detriments	yes	Disapproval	3	42	Female	6	32	100
108	Ecuador	E13	MAAE_Imbabura	Kept_the_same	Benefits	yes	Disapproval	10	45	Male	12	10	100
109	Ecuador	E13	MAAE_Imbabura	Increased	Benefits	no	Disapproval	0	47	Male	18	0	100
110	Ecuador	E13	MAAE_Imbabura	Kept_the_same	Detriments	yes	Approval	0	46	Female	6	17	100
111	Ecuador	E14	MAAE_Imbabura	Kept_the_same	Detriments	no	Disapproval	2	40	Male	6	15	50
112	Ecuador	E14	MAAE_Imbabura	Reduced	Detriments	no	Approval	0	36	Male	6	12	100
113	Ecuador	E14	MAAE_Imbabura	Reduced	Detriments	yes	Approval	1	32	Female	6	7	10
114	Ecuador	E14	MAAE_Imbabura	Reduced	Detriments	yes	Approval	3	53	Female	6	15	0
115	Ecuador	E14	MAAE_Imbabura	Reduced	Detriments	yes	Disapproval	0	35	Male	6	13	50
116	Ecuador	E14	MAAE_Imbabura	Reduced	Detriments	no	Approval	0	45	Female	6	5	100
117	Ecuador	E14	MAAE_Imbabura	Kept_the_same	Detriments	yes	Approval	3	18	Male	12	10	100
118	Ecuador	E14	MAAE_Imbabura	Reduced	Detriments	yes	Disapproval	5	28	Male	12	10	100
119	Ecuador	E14	MAAE_Imbabura	Reduced	Detriments	yes	Approval	12	57	Female	2	16	100
120	Ecuador	E15	MAAE_Pichincha	Reduced	Detriments	no	Disapproval	0	40	Female	6	0	100
121	Ecuador	E15	MAAE_Pichincha	Reduced	Detriments	yes	Disapproval	0	38	Male	6	6	30
122	Ecuador	E15	MAAE_Pichincha	Reduced	Detriments	yes	Disapproval	0	38	Female	0	5	0
123	Ecuador	E15	MAAE_Pichincha	Reduced	Detriments	yes	Disapproval	3	47	Male	6	20	0
124	Ecuador	E15	MAAE_Pichincha	Kept_the_same	Detriments	no	Approval	0	35	Male	6	0	0
125	Ecuador	E15	MAAE_Pichincha	Reduced	Detriments	no	Approval	2	18	Female	11	15	0
126	Ecuador	E15	MAAE_Pichincha	Reduced	None	no	Approval	0	55	Male	2	0	100
127	Ecuador	E15	MAAE_Pichincha	Reduced	Detriments	yes	Unknown	0	60	Female	0	5	100
128	Ecuador	E15	MAAE_Pichincha	Reduced	Detriments	yes	Approval	0	32	Male	6	30	100
129	Ecuador	E15	MAAE_Pichincha	Kept_the_same	Detriments	no	Approval	0	44	Female	6	10	0
130	Ecuador	E15	MAAE_Pichincha	Reduced	Detriments	yes	Approval	0	50	Female	6	20	100
131	Ecuador	E15	MAAE_Pichincha	Kept_the_same	Detriments	yes	Unknown	0	53	Female	0	5	100
132	Ecuador	E16	MAAE_Napo	Kept_the_same	Detriments	yes	Approval	5	48	Female	12	3	100
133	Ecuador	E16	MAAE_Napo	Increased	Both	no	Approval	3	32	Male	12	11	100
134	Ecuador	E16	MAAE_Napo	Increased	None	no	Disapproval	0	50	Male	17	20	0
135	Ecuador	E16	MAAE_Napo	Kept_the_same	Detriments	yes	Approval	0	40	Male	9	30	100
136	Ecuador	E16	MAAE_Napo	Reduced	Detriments	no	Disapproval	7	55	Female	6	3	100
137	Ecuador	E16	MAAE_Napo	Kept_the_same	None	no	Disapproval	50	56	Female	9	20	100
138	Ecuador	E16	MAAE_Napo	Kept_the_same	Detriments	yes	Approval	4	50	Male	6	30	100
139	Ecuador	E16	MAAE_Napo	Kept_the_same	Detriments	no	Disapproval	0	42	Male	9	6	100
140	Ecuador	E16	MAAE_Napo	Reduced	Detriments	yes	Disapproval	0	45	Male	6	15	100
141	Ecuador	E16	MAAE_Napo	Kept_the_same	Detriments	yes	Approval	0	50	Male	6	35	100
142	Ecuador	E16	MAAE_Napo	Reduced	Detriments	yes	Approval	40	53	Female	4	27	100
143	Ecuador	E16	MAAE_Napo	Increased	None	no	Approval	0	18	Female	7	3	100
144	Ecuador	E16	MAAE_Napo	Kept_the_same	Detriments	no	Disapproval	0	70	Male	5	10	100
145	Ecuador	E16	MAAE_Napo	Kept_the_same	Both	yes	Approval	0	44	Female	6	15	100
146	Ecuador	E17	MAAE_Napo	Kept_the_same	Detriments	yes	Disapproval	0	45	Male	6	15	100
147	Ecuador	E17	MAAE_Napo	Increased	Detriments	yes	Approval	0	61	Male	6	20	100
148	Ecuador	E17	MAAE_Napo	Increased	Both	yes	Disapproval	0	60	Male	8	0	0
149	Ecuador	E17	MAAE_Napo	Increased	Detriments	yes	Approval	5	64	Male	12	20	100
150	Ecuador	E18	MAAE_Napo	Increased	Both	yes	Disapproval	3	55	Male	12	0	100
151	Ecuador	E18	MAAE_Napo	Increased	Benefits	no	Disapproval	1	34	Male	18	0	0
152	Ecuador	E18	MAAE_Napo	Increased	Both	yes	Disapproval	0	52	Female	6	30	100
153	Ecuador	E18	MAAE_Napo	Increased	Both	yes	Disapproval	3	47	Male	12	0	100
154	Ecuador	E18	MAAE_Napo	Increased	None	no	Approval	2	38	Male	6	30	100
155	Ecuador	E18	MAAE_Napo	Kept_the_same	Detriments	no	Disapproval	5	60	Male	12	60	100
156	Ecuador	E18	MAAE_Napo	Kept_the_same	None	no	Disapproval	0	43	Male	4	10	100
157	Ecuador	E18	MAAE_Napo	Kept_the_same	Detriments	no	Disapproval	0	33	Female	6	30	100
158	Ecuador	E19	MAAE_Napo	Reduced	Both	yes	Disapproval	0	50	Male	12	50	100
159	Ecuador	E20	MAAE_Pichincha	Increased	Detriments	no	Approval	0	54	Male	6	0	0
160	Ecuador	E20	MAAE_Pichincha	Kept_the_same	Detriments	no	Approval	0	30	Male	12	20	0
161	Ecuador	E20	MAAE_Pichincha	Increased	Benefits	yes	Disapproval	2	54	Male	13	12	0
162	Ecuador	E20	MAAE_Pichincha	Increased	Detriments	yes	Approval	0	60	Female	0	0	0
163	Ecuador	E20	MAAE_Pichincha	Increased	Benefits	no	Disapproval	0	44	Female	6	0	0
164	Ecuador	E20	MAAE_Pichincha	Increased	Both	yes	Approval	0	40	Male	6	23	100
165	Ecuador	E21	MAAE_Tungurahua	Kept_the_same	Both	no	Disapproval	2	28	Male	12	0	100
166	Ecuador	E21	MAAE_Tungurahua	Reduced	Detriments	yes	Disapproval	0	32	Male	12	30	0
167	Ecuador	E21	MAAE_Tungurahua	Kept_the_same	Detriments	no	Disapproval	0	55	Male	6	0	100
168	Ecuador	E21	MAAE_Tungurahua	Kept_the_same	Both	no	Disapproval	5	41	Male	6	0	5
169	Ecuador	E21	MAAE_Tungurahua	Increased	Detriments	no	Approval	0	56	Male	6	0	100
170	Ecuador	E21	MAAE_Tungurahua	Increased	Both	no	Disapproval	3	84	Male	1	0	50
171	Ecuador	E21	MAAE_Tungurahua	Increased	Detriments	no	Approval	0	28	Male	6	0	100
172	Ecuador	E21	MAAE_Tungurahua	Reduced	Detriments	no	Disapproval	1	38	Male	6	0	100
173	Ecuador	E21	MAAE_Tungurahua	Kept_the_same	Detriments	no	Disapproval	0	27	Male	6	0	100
174	Colombia	C01	CORTOLIMA	Increased	Benefits	yes	Disapproval	25	101	Male	0	105	59
175	Colombia	C01	CORTOLIMA	Increased	Benefits	no	Disapproval	350	47	Male	5	20	100
176	Colombia	C01	CORTOLIMA	Reduced	Detriments	no	Disapproval	0	30	Male	3	16	100
177	Colombia	C01	CORTOLIMA	Increased	Detriments	yes	Disapproval	0	43	Male	2	12	100
178	Colombia	C01	CORTOLIMA	Kept_the_same	Detriments	no	Disapproval	0	43	Male	5	5	100
179	Colombia	C02	CAM	Increased	Both	no	Approval	20	50	Male	4	10	100
180	Colombia	C02	CAM	Kept_the_same	Both	yes	Approval	0	46	Female	9	1	50
181	Colombia	C02	CAM	Kept_the_same	Both	yes	Disapproval	6	50	Female	5	12	100
182	Colombia	C02	CAM	Reduced	Detriments	yes	Disapproval	0	40	Male	2	3	100
183	Colombia	C02	CAM	Kept_the_same	Detriments	yes	Approval	0	27	Female	12	7	30
184	Colombia	C02	CAM	Reduced	Both	yes	Disapproval	8	76	Female	3	5	100
185	Colombia	C02	CAM	Kept_the_same	Both	yes	Approval	2	80	Female	1	15	10
186	Colombia	C02	CAM	Kept_the_same	Detriments	no	Approval	8	76	Male	4	6	90
187	Colombia	C02	CAM	Kept_the_same	None	no	Approval	12	39	Male	11	2	100
188	Colombia	C02	CAM	Kept_the_same	Detriments	no	Unknown	0	91	Male	3	19	50
189	Colombia	C02	CAM	Increased	Detriments	no	Approval	1	56	Female	5	22	100
190	Colombia	C02	CAM	Kept_the_same	Benefits	no	Approval	3	55	Female	12	12	90
191	Colombia	C02	CAM	Kept_the_same	Detriments	no	Disapproval	0	55	Male	3	3	80
192	Colombia	C02	CAM	Kept_the_same	None	yes	Approval	1	47	Female	2	21	10
193	Colombia	C02	CAM	Kept_the_same	Detriments	no	Approval	3	52	Female	4	30	100
194	Colombia	C02	CAM	Reduced	Detriments	no	Disapproval	2	45	Female	2	4	80
195	Colombia	C02	CAM	Reduced	Detriments	no	Disapproval	0	42	Male	2	0	90
196	Colombia	C02	CAM	Kept_the_same	Detriments	yes	Approval	0	52	Male	3	9	100
197	Colombia	C02	CAM	Kept_the_same	None	no	Disapproval	3	51	Female	1	4	100
198	Colombia	C02	CAM	Increased	None	no	Approval	3	47	Male	3	0	70
199	Colombia	C02	CAM	Reduced	Detriments	yes	Disapproval	0	81	Female	4	7	100
200	Colombia	C02	CAM	Increased	None	no	Disapproval	0	65	Female	2	10	100
201	Colombia	C02	CAM	Kept_the_same	None	no	Approval	2	29	Female	7	2	100
202	Colombia	C02	CAM	Reduced	None	no	Approval	0	19	Female	7	10	59
203	Colombia	C02	CAM	Increased	Benefits	yes	Disapproval	1	18	Male	10	10	100
204	Colombia	C02	CAM	Kept_the_same	None	no	Approval	0	20	Female	11	2	100
205	Colombia	C02	CAM	Reduced	Detriments	yes	Disapproval	0	55	Female	2	10	50
206	Colombia	C02	CAM	Increased	Detriments	no	Approval	0	81	Male	2	8	100
207	Colombia	C02	CAM	Kept_the_same	Detriments	yes	Approval	1	47	Female	1	5	100
208	Colombia	C02	CAM	Kept_the_same	None	no	Unknown	10	28	Male	11	10	80
209	Colombia	C02	CAM	Increased	None	no	Approval	1	31	Male	5	4	80
210	Colombia	C03	CAM	Increased	None	no	Disapproval	2	30	Male	5	17	0
211	Colombia	C03	CAM	Kept_the_same	Detriments	yes	Approval	0	50	Female	0	15	100
212	Colombia	C03	CAM	Reduced	Detriments	yes	Approval	1	44	Male	5	50	100
213	Colombia	C03	CAM	Reduced	Detriments	yes	Approval	4	111	Male	0	410	100
214	Colombia	C03	CAM	Increased	Both	no	Approval	1	33	Male	12	22	100
215	Colombia	C03	CAM	Increased	Benefits	no	Approval	4	57	Male	12	27	100
216	Colombia	C03	CAM	Increased	Benefits	yes	Approval	0	55	Male	6	10	0
217	Colombia	C03	CAM	Increased	None	yes	Approval	2	35	Male	6	20	100
218	Colombia	C03	CAM	Kept_the_same	Detriments	yes	Approval	0	31	Male	5	25	100
219	Colombia	C03	CAM	Increased	Detriments	yes	Approval	6	59	Male	6	20	100
220	Colombia	C04	CORANTIOQUIA	Increased	Both	yes	Approval	0	42	Female	1	12	0
221	Colombia	C04	CORANTIOQUIA	Increased	Benefits	no	Disapproval	50	63	Female	16	0	0
222	Colombia	C04	CORANTIOQUIA	Increased	Benefits	no	Disapproval	30	65	Male	16	0	0
223	Colombia	C04	CORANTIOQUIA	Increased	Detriments	no	Approval	0	62	Male	1	0	100
224	Colombia	C04	CORANTIOQUIA	Reduced	Detriments	no	Disapproval	3	67	Male	5	22	70
225	Colombia	C04	CORANTIOQUIA	Increased	None	no	Disapproval	2	37	Male	5	50	100
226	Colombia	C04	CORANTIOQUIA	Increased	None	no	Approval	0	30	Male	5	20	0
227	Colombia	C04	CORANTIOQUIA	Increased	Benefits	no	Approval	0	67	Male	5	1	0
228	Colombia	C04	CORANTIOQUIA	Increased	Both	yes	Approval	0	73	Male	5	0	0
229	Colombia	C05	CORANTIOQUIA	Increased	Benefits	no	Approval	3	53	Male	1	20	0
230	Colombia	C05	CORANTIOQUIA	Reduced	Detriments	yes	Disapproval	0	75	Male	0	25	100
231	Colombia	C05	CORANTIOQUIA	Kept_the_same	Detriments	yes	Approval	2	26	Male	3	10	100
232	Colombia	C05	CORANTIOQUIA	Increased	None	no	Approval	20	40	Male	4	40	100
233	Colombia	C05	CORANTIOQUIA	Kept_the_same	Detriments	yes	Disapproval	0	51	Female	0	13	100
234	Colombia	C05	CORANTIOQUIA	Increased	Detriments	no	Approval	0	61	Male	2	0	100
235	Colombia	C05	CORANTIOQUIA	Kept_the_same	Detriments	no	Disapproval	5	52	Female	3	20	100
236	Colombia	C05	CORANTIOQUIA	Kept_the_same	Detriments	no	Approval	5	67	Male	7	0	100
237	Colombia	C05	CORANTIOQUIA	Kept_the_same	Detriments	no	Approval	3	34	Female	2	10	100
238	Colombia	C05	CORANTIOQUIA	Increased	Benefits	no	Approval	30	31	Male	12	5	100
239	Colombia	C05	CORANTIOQUIA	Increased	Detriments	no	Approval	0	35	Male	1	0	0
240	Colombia	C05	CORANTIOQUIA	Increased	Detriments	no	Approval	50	55	Female	5	3	100
241	Colombia	C05	CORANTIOQUIA	Kept_the_same	Both	no	Disapproval	15	56	Male	4	45	100
242	Colombia	C05	CORANTIOQUIA	Reduced	Detriments	no	Approval	0	65	Female	2	2	100
243	Colombia	C05	CORANTIOQUIA	Reduced	Detriments	no	Approval	0	27	Female	11	0	100
244	Colombia	C05	CORANTIOQUIA	Reduced	Detriments	yes	Disapproval	0	29	Male	11	23	50
245	Colombia	C05	CORANTIOQUIA	Kept_the_same	Detriments	no	Approval	20	44	Female	5	9	100
246	Colombia	C05	CORANTIOQUIA	Increased	Detriments	no	Approval	0	35	Female	5	8	100
247	Colombia	C05	CORANTIOQUIA	Increased	Detriments	yes	Approval	0	51	Female	3	10	100
248	Colombia	C05	CORANTIOQUIA	Kept_the_same	Detriments	no	Approval	3	18	Female	9	8	0
249	Colombia	C05	CORANTIOQUIA	Increased	Detriments	no	Approval	10	45	Female	5	5	100
250	Colombia	C05	CORANTIOQUIA	Reduced	Detriments	yes	Approval	20	42	Female	3	10	100
251	Colombia	C05	CORANTIOQUIA	Increased	Detriments	yes	Disapproval	0	31	Female	11	11	80
252	Colombia	C05	CORANTIOQUIA	Increased	Benefits	no	Disapproval	4	70	Male	4	30	100
253	Colombia	C05	CORANTIOQUIA	Increased	Both	no	Disapproval	3	55	Male	2	16	20
254	Colombia	C05	CORANTIOQUIA	Increased	Both	no	Approval	5	73	Male	13	0	0
255	Colombia	C05	CORANTIOQUIA	Kept_the_same	Detriments	no	Disapproval	0	21	Female	9	0	100
256	Colombia	C05	CORANTIOQUIA	Kept_the_same	Detriments	no	Approval	2	37	Female	11	5	100
257	Colombia	C05	CORANTIOQUIA	Increased	Detriments	no	Approval	0	28	Female	11	6	100
258	Colombia	C05	CORANTIOQUIA	Kept_the_same	Both	yes	Disapproval	3	53	Male	0	13	100
259	Colombia	C05	CORANTIOQUIA	Reduced	Detriments	yes	Approval	0	31	Female	4	12	0
260	Colombia	C05	CORANTIOQUIA	Increased	None	no	Disapproval	20	67	Male	11	1	100
261	Colombia	C05	CORANTIOQUIA	Increased	None	no	Disapproval	0	27	Male	4	0	0
262	Colombia	C05	CORANTIOQUIA	Increased	Benefits	no	Approval	0	54	Male	0	4	0
263	Colombia	C06	CORANTIOQUIA	Increased	Both	no	Approval	5	63	Female	5	87	60
264	Colombia	C06	CORANTIOQUIA	Increased	Benefits	no	Approval	100	66	Female	13	20	90
265	Colombia	C06	CORANTIOQUIA	Kept_the_same	Detriments	no	Approval	0	36	Male	3	8	0
266	Colombia	C06	CORANTIOQUIA	Increased	Benefits	yes	Approval	15	70	Male	0	50	100
267	Colombia	C06	CORANTIOQUIA	Increased	Both	no	Approval	0	30	Male	5	1	0
268	Colombia	C06	CORANTIOQUIA	Kept_the_same	Benefits	no	Approval	2	64	Male	5	0	20
269	Colombia	C06	CORANTIOQUIA	Kept_the_same	Both	no	Approval	1	46	Female	3	0	0
270	Colombia	C06	CORANTIOQUIA	Increased	Both	no	Approval	0	18	Male	11	1	0
271	Colombia	C06	CORANTIOQUIA	Kept_the_same	Detriments	yes	Approval	0	25	Female	3	5	100
272	Colombia	C06	CORANTIOQUIA	Kept_the_same	Benefits	no	Approval	0	40	Female	2	0	20
273	Colombia	C06	CORANTIOQUIA	Increased	Benefits	no	Approval	0	64	Male	4	0	20
274	Colombia	C06	CORANTIOQUIA	Kept_the_same	Detriments	no	Approval	2	40	Male	4	0	100
275	Colombia	C06	CORANTIOQUIA	Increased	Benefits	no	Disapproval	6	51	Male	2	23	20
276	Colombia	C06	CORANTIOQUIA	Increased	Benefits	no	Approval	0	70	Male	0	0	0
277	Colombia	C06	CORANTIOQUIA	Increased	Benefits	no	Approval	2	28	Female	9	56	0
278	Colombia	C06	CORANTIOQUIA	Increased	Benefits	no	Approval	6	50	Female	3	2	20
279	Colombia	C06	CORANTIOQUIA	Increased	Benefits	no	Approval	20	63	Male	5	43	66
280	Colombia	C06	CORANTIOQUIA	Increased	Benefits	no	Approval	0	54	Male	2	0	10
281	Colombia	C06	CORANTIOQUIA	Increased	Benefits	no	Disapproval	15	56	Male	16	0	100
282	Colombia	C06	CORANTIOQUIA	Kept_the_same	Benefits	no	Disapproval	0	63	Male	2	0	0
