# Supplementary material
Source: Elsevier journal article supplement (https://www.sciencedirect.com/science/article/pii/S2530064421000936)
Supplement: mmc2 [file S2530064421000936:mmc2.xlsx]

## Sheet: Spanish
Responsable:			Autoridad Ambiental:		Fecha:	ID:
País:		Canton/municipio:		Parroquia/vereda:		Sector:
#	¿Usted sabe que animales existen en esta zona?	Beneficio (B) Perjuicio (P) Ninguna (N)	Tipo de beneficio/perjuicio	Ordenelas de la mas perjudicial (-1,-2,-3) a la más beneficiosa (1,2,3) (0 =ni perjudicial, ni beneficiosa)	¿De cuales de esas especies usted a recibido beneficios (B) / perjuicios(P)?	¿Le gustaria que estas especies aumenten (A), disminuyan (D) o permanezcan igual (I)?
1
2
3
4
5
6
7
8
9
10
11
12
13
14
15
Spizaetus isidori
Socio-economia y socio-ecología
¿Cuántas hectareas tiene este predio? __, ¿Otro de su propiedad( ) o a su cargo( )? Si___ No___ Hectareas: ___, ___, ___, ___
¿La cobertura de bosque en el/los predio(s) esta aumenando__, disminuyedo__, estable__? Área de reforesación____ Área de reserva____
¿Cazado/capturado Águilas? Si__ No__ ¿Cuantas? ___ Motivo:
¿Cuantos vecinos tienen? ___ ¿Cuantos de sus vecinos talan el bosque: __, Hacen cacería: __, Cazan el águila:__, otra: ___
¿Ha talado arboles en su predios? Si__No__ ¿Cuantos? ___ ¿Para que uso? Casas__%, Cercos__%, Vender__%, Otro__%
¿Ha talado bosque en su predios? Si__No__ ¿Cuantas hectareas? ___ ¿Para que uso? Potrero__% Cultivo__% Otro__%
¿Cazado/capturado otras especies (pavas, ardillas, monos)? Si__ No__ ¿Cuantas? ___ Motivo:
¿Cuantas gallinas/pollos tiene? ______			¿Cuántos ha pérdido por el Águila? ____		¿Cuántos por otras sp?____¿Cuál especie?____
Las pérdidas por el Águila en cuantos años ocurrieron? _____ ¿Cuántas en 2018? ____ ¿Cuántas en 2019? ____
Socio-demografía, localización y observaciones del encuestador
Años de educación: Primaria ___, secundaria ___, técnica/universitaria ___					Edad ___	Género _________
Número de miembros que viven en la casa? Niños___ Adultos___ Adultos mayores___ ¿Cuántos hijos tiene? ____
Ha asistido a charlas/capacitaciones sobre el medio ambiente? Cuantas? ____					y sobre el Águila ¿Cuántas?____
Ingresos economicos mensuales: de qué provienen: __________ ___%, __________ ___%, __________ ___%
Apueba _____/ desaprueba____ la gestion: de la autoridad ambiental? Porqué?
¿Usted acá es dueño( ), arrendatario( ), cuidador( ), administrador( ), otra______? Coordenadas: , Altitud: ____m
Track desde el camino principal a la finca tomado con oruxmaps (No. de track): ___________ Distancia desde el nido:_____
Observaciones en el predio (SI o No): hay alguna evidencia de tala rasa: __, Cacería: __, Cacería del águila:__, Entresaca___
Numero de predios vecinos:___ Vecinos con evidencia de: tala rasa ___, Cacería ___, Cacería del águila ___, Entresaca ___

## Sheet: English
Responsible:			Environmental Authority:		Date:	ID:
Country:		Municipality:		Parroquia/vereda:		Sector:
#	Do you know what animals exist in this area?	Benefit (B) Detriment (D) Both (B) None (N)	Type of benefit/detriment	Order them from the most detrimental (-1,-2,-3) to the most beneficial (1,2,3) (0 = neither detrimental nor beneficial)	From which of those species have you received benefits (B) / detriments (D)?	Would you like black-and-chestnut eagle population to be: reduced (R), kept the same (K) or increased (I)?
1
2
3
4
5
6
7
8
9
10
11
12
13
14
15
Spizaetus isidori
Socio-economy and socio-ecology
How many hectares does this property have? __, Do you own another property( ) or in your charge( )? Yes___ No___ Hectares: ___
Is the forest cover on the property(s) increasing____, decreasing____, stable____? Reforestation area____ Reserve area____
Hunted/captured the Eagles? Yes__ No__ How many? ___ Reason:
How many neighbors do you have? ___ How many of your neighbors cut down the forest: __, They hunt: __, They hunt the eagle:__, another: ___
Have you cut down trees on your property? Yes__No__ How many? ___ What do you use trees for? Houses__%, Fences__%, Sell__%, Other__%
Have you cut down forest on your land? Yes__No__ How many hectares? ___ What do you use it for? Pastures__% Crops__% Other__%
Hunted/caught other species (guan, squirrels, monkeys)? Yes__ No__ How many? ___ Reason:
How many hens/chickens do you have? ______			How many have you lost to the Eagle? ____		How many for other sp?____Which species?____
Losses due to eagles, in how many years did they occur? _____ How many in 2018? ____ How many in 2019? ____
Socio-demography, localizing and observations of the surveyor
Years of education: Primary ___, secondary ___, technical/university ___					Age ___	Gender _________
Number of members living in the house? Children___, Adults___, older adults___, how many children do you have? ____
Have you attended talks/trainings on the environment? How many? ____					and about the Eagle How many?____
Monthly economic income and where it comes from - percentage: __________ ___%, __________ ___%, __________ ___%
Approve _____/ Disapprove ____ the management of the environmental authority? What is the reason of this?
Are you the owner( ), tenant( ), caregiver( ), manager( ), other______? Coordinates: , Altitude: ____m
Track from the main road to the farm (No. track): ___________ Distance from nest:_____ m
Observations on the property (Yes or No): there is some evidence of clear-cutting: __, Hunting: __, Eagle hunt:__, Selective logging___
Number of neighboring properties:___ Neighbors with evidence of: clear-cutting: __, Hunting: __, Eagle hunt:__, Selective logging___
